# Supplementary material for: Exploring Efflux as a Mechanism of Reduced Susceptibility towards Biocides and Fluoroquinolones in Staphylococcus pseudintermedius
Source: MDPI journal article supplement (doi:10.3390/ani13071270), 2023-04-06
Supplement: s1 [file s1]

## Article

# Exploring Efflux as a Mechanism of Reduced Susceptibility towards Biocides and Fluoroquinolones in *Staphylococcus pseudintermedius*

Marta Leal<sup>1</sup>, Catarina Morais<sup>1</sup>, Bárbara Ramos<sup>1</sup>, Constança Pomba<sup>2,3</sup>, Patrícia Abrantes<sup>1</sup>, Sofia Santos Costa<sup>1</sup> and Isabel Couto<sup>1\*</sup>
<sup>1</sup> Global Health and Tropical Medicine, GHMT, Instituto de Higiene e Medicina Tropical, IHMT, Universidade Nova de Lisboa, UNL, Rua da Junqueira 100, 1349-008 Lisbon, Portugal

<sup>2</sup> CIISA, Centre of Interdisciplinary Research in Animal Health, Faculty of Veterinary Medicine, University of Lisbon, Avenida da Universidade Técnica, 1300-477, Lisbon, Portugal

<sup>3</sup> GeneVet, Laboratório de Diagnóstico Molecular Veterinário, Rua Quinta da Nora Loja 3B, 2790-140 Carnaxide, Portugal

\* Correspondence: icouto@ihmt.unl.pt; Tel.: +351-21-3652652; Fax: +351-21-3632105

**Table S1.** Distribution of MRSP, MSSP and MDR phenotypes among the *S. pseudintermedius* study collection (n=155).

| <i>S. pseudintermedius</i> clinical strains | Number of strains (n/N) (%) | Reference |
|---------------------------------------------|-----------------------------|-----------|
| MRSP                                        | 48/155 (31.0%)              | [1]       |
| MRSP non-MDR                                | 2/48 (4.2%)                 |           |
| MRSP-MDR                                    | 46/48 (95.8%)               |           |
| MSSP                                        | 107/155 (69.0%)             |           |
| MSSP non-MDR                                | 83/107 (77.6%)              |           |
| MSSP-MDR                                    | 24/107 (22.4%)              |           |

MRSP: Methicillin-resistant *S. pseudintermedius*; MSSP: Methicillin-susceptible *S. pseudintermedius*; MDR: Multidrug resistant. Susceptibility profiles were interpreted according to guidelines VET01S (CLSI, 2020) (clindamycin, tetracycline, enrofloxacin, pradofloxacin) [2], M100-ED32 (CLSI, 2022) (penicillin, oxacillin, gentamicin, erythromycin, trimethoprim-sulfamethoxazole, chloramphenicol, rifampicin, ciprofloxacin, moxifloxacin) [3].

**Table S2.** Control strains used for the detection of plasmid-encoded efflux pump genes.

| Target gene   | Control strain        | Reference |
|---------------|-----------------------|-----------|
| <i>qacA/B</i> | <i>S. aureus</i> SM39 | [4]       |
| <i>smr</i>    | <i>S. aureus</i> SM52 | [4,5]     |

**Table S3.** Primers used in this study.

| Target gene                                    | Primers          | Nucleotide Sequence (5'-3') | Amplicon size (bp) | Reference |
|------------------------------------------------|------------------|-----------------------------|--------------------|-----------|
| Detection of plasmid-encoded efflux pump genes |                  |                             |                    |           |
| <i>qacA/B</i>                                  | <i>qacA/B_FW</i> | GCTGCATTTATGACAATGTTT       | 628                | [6]       |
|                                                | <i>qacA/B_RV</i> | AATCCACCTACTAAAGCAG         |                    |           |
| <i>smr</i>                                     | <i>smr_FW</i>    | ATAAGTACTGAAGTTATTGGAAGT    | 285                | [7]       |
|                                                | <i>smr_RV</i>    | TTCCGAAAATGTTTAACGAAACTA    |                    |           |
|                                                | <i>gyrB_RV</i>   | GGATGCGGTTTTACCAGATA        |                    |           |

bp: Base pair; FW: Forward; RV: Reverse.

## References

1. Morais, C.; Costa S.S.; Leal, M.; Ramos, B.; Andrade, M.; Ferreira, C.; Abrantes, P.; Pomba, C.; Couto, I. Genetic diversity and antimicrobial resistance profiles of *Staphylococcus pseudintermedius* associated to skin and soft-tissue infections in companion animals in Lisbon, Portugal. *Front Microbiol*, **2023**. *In press*, doi: 10.3389/fmicb.2023.1167834
2. Clinical and Laboratory Standards Institute (VET01S CLSI). Performance standards for antimicrobial disk and dilution susceptibility tests for bacteria isolated from animals. *CLSI supplement VET01S*, 5<sup>th</sup>ed. Clinical and Laboratory Standards Institute, USA, **2020**.
3. Clinical and Laboratory Standards Institute (CLSI). Performance standards for antimicrobial susceptibility testing. CLSI supplement M100, 32<sup>nd</sup> ed. Clinical and Laboratory Standards Institute, USA, **2022**.
4. Costa S.S.; Palma C.; Kadlec K.; Fessler A.T.; Viveiros M.; Melo-Cristino J.; Schwarz S.; Couto I. Plasmid-borne antimicrobial resistance of *Staphylococcus aureus* isolated in a hospital in Lisbon, Portugal. *Microb Drug Resist*, **2016**, *22*, 1–10. doi: 10.1089/mdr.2015.0352
5. Costa S.S.; Junqueira E.; Palma C.; Viveiros M.; Melo-Cristino J.; Amaral L.; Couto I. Resistance to antimicrobials mediated by efflux pumps in *Staphylococcus aureus*. *Antibiotics*, **2013**, *2*, 83–99. doi: 10.3390/antibiotics2010083
6. Anthonisen, I. L.; Sunde, M.; Steinum, T. M.; Sidhu, M. S.; Sorum, H. Organization of the antiseptic resistance gene *qacA* and Tn552-related-lactamase genes in multidrug-resistant *Staphylococcus haemolyticus* strains of animal and human origins. *Antimicrob Agents Chemother*, **2002**, *46*, 3606–3612. doi: 10.1128/AAC.46.11.3606-3612.2002
7. Bjorland, J.; Sunde, M.; Waage, S. Plasmid-borne *smr* gene causes resistance to quaternary ammonium compounds in bovine *Staphylococcus aureus*. *J Clin Microbiol*, **2001**, *39*, 3999–4004.
